1 Presubmission publication, request for comments:  
2  
3

## 4 **Classifying Aging as a Disease in the context of ICD-11**

5  
6 Alex Zhavoronkov<sup>1,2\*</sup>, Bhupinder Bhullar<sup>3</sup>  
7

8 <sup>1</sup> The Biogerontology Research Foundation, Oxford, United Kingdom

9 <sup>2</sup> Insilico Medicine, Johns Hopkins University, Emerging Technology Centers, Baltimore, MD,  
10 21218, USA

11 <sup>3</sup> Novartis Pharma AG, Department of Developmental and Molecular Pathways, Novartis  
12 Institute for Biomedical Research, Fabrikstrasse 22, 4056 Basel, Switzerland  
13

14 \*Alex Zhavoronkov, PhD, +1 626 593 7957, alex@biogerontology.org  
15

### 16 **Abstract**

17  
18 Aging is a complex continuous multifactorial process leading to loss of function and crystalizing  
19 into the many age-related diseases. Here, we explore the arguments for classifying aging as a  
20 disease in the context of the upcoming World Health Organization's 11th International Statistical  
21 Classification of Diseases and Related Health Problems (ICD-11), expected to be finalized in  
22 2018. We hypothesize that classifying aging as a disease will result in new approaches and  
23 business models for addressing aging as a treatable condition, which will lead to both economic  
24 and healthcare benefits for all stakeholders. Classification of aging as a disease may lead to more  
25 efficient allocation of resources by enabling funding bodies and other stakeholders to use  
26 quality-adjusted life years (QALYs) and healthy-years equivalent (HYE) as metrics when  
27 evaluating both research and clinical programs. We propose forming a Task Force to interface  
28 the WHO in order to develop a multidisciplinary framework for classifying aging as a disease.  
29

### 30 **Introduction**

31  
32 The recognition of a condition or a chronic process as a disease is an important milestone for the  
33 pharmaceutical industry, academic community, healthcare and insurance companies, policy  
34 makers, and individual, as the presence of a condition in disease nomenclature and classification  
35 greatly impacts the way it is treated, researched and reimbursed. However, achieving a  
36 satisfactory definition of disease is challenging, primarily due to the vague definitions of the  
37 state of health and disease. Here, we explore the potential benefits of recognizing aging as a  
38 disease in the context of current socioeconomic challenges and recent biomedical advances.  
39

### 40 **Brief History of Disease Classification**

41  
42 The concept of disease classification has existed for centuries, with professional classification  
43 dating back to 15<sup>th</sup> century Italy, but international classification systems were not established  
44 until relatively recently. One of the first major strides was made by William Cullen, who  
45 provided a classified list of diseases in his *Nosologiae Methodicae* synopsis in 1769. The first  
46 authoritative sources of disease terminology were then developed in 19th century England

47 (Robb-smith 1969; Moriyama et al., 2011), followed by the nomenclature of diseases by the  
48 American Medical Association (National Conference on Nomenclature of Disease, 1933;  
49 American Medical Association, 1961). Real progress toward the modern classification system,  
50 however, began when efforts were internationalized. The first international nomenclature and  
51 disease classification was created and maintained by the International Statistical Institute (ISI)  
52 and is generally referred to as ICD-1, as it was developed at the first international conference to  
53 revise the International Classification of Causes of Death in 1900. Since 1948, the World Health  
54 Organization (WHO) has assumed the responsibility of maintaining, preparing and publishing  
55 the revisions of the ICD. The 10th revision of the ICD, referred as ICD-10, was first published in  
56 1992 (World Health Organization, 1992), and the 11th revision (ICD-11) is expected to be  
57 released in 2018 (<http://www.who.int/classifications/icd/revision/timeline/en/>). Thus, as this date  
58 approaches there is a sense of urgency among all stakeholders to codify classification proposals  
59 before the window of opportunity closes for another decade or longer (World Health  
60 Organization, 2006).

61  
62 In its current definition, published in 1948, WHO describes health as a “state of complete  
63 physical, mental and social well-being, not merely the absence of infirmity” (World Health  
64 Organization, 1948). This definition is restrictive and there have been an increasing number of  
65 calls to change it (Saracci, 1997; Bircher, 2005; Huber et al., 2011). The criteria for disease, on  
66 the other hand, have historically changed over time. This is partly due to increasing health  
67 expectations or changes in diagnostic abilities, but mostly due to a combination of social and  
68 economic reasons (Scully, 2004). It was not until the 6th revision of ICD (ICD-6) in 1949 that  
69 mental disorders were first classified as diseases (Katschnig, 2010). On the other extreme,  
70 homosexuality was classified as a disease until 1974 by the American Psychiatric Association  
71 (APA) (Reznek, 1987), an organization which frequently disagrees with the ICD on disease  
72 classification. Since the completion of ICD-10, debates in biomedical literature have been  
73 primarily focused on psychiatric disorders (First et al., 2015). A recent PubMed search using  
74 “ICD-11” since 1992 produced 333 results, while “‘ICD-11’ NOT mental NOT psychiatric”  
75 produced only 61 results.

76  
77 While mental health issues continue to stay at the forefront, another major socioeconomic  
78 problem has surfaced and is here to stay. Over the past decade, there has been an enormous shift  
79 in the percentage of the world population that is elderly, and age demographics are projected to  
80 continue to change dramatically in this direction in the next few decades. The socioeconomic  
81 burden of this shift cannot be understated. Without advances in the ability to slow the aging  
82 process, extend the healthy life span, and prevent the associated diseases, it will be difficult to  
83 support the large numbers of those no longer enrolled in the workforce and instead enrolled in  
84 costly long term health care.

85  
86 Fortunately, the ability to track multiple underlying causes of death has provided a more granular  
87 view on the causes of death in old age and in turn has facilitated better disease association and  
88 classification (Moriyama et al., 2011). Our understanding of aging mechanisms is constantly  
89 evolving. Similarly, disease classification is an evolving process and advances in our  
90 understanding of aging may enable the classification of aging as a disease in the upcoming  
91 revision of the ICD. To do so would have multiple benefits, garner more attention on the topic,  
92 and ultimately boost progress in this active area of biomedical research.

93

## 94 **Biology of aging as a disease**

95

96 Aging is a complex multifactorial process leading to loss of function, multiple diseases, and  
97 ultimately death. There are many theories explaining the origin of the overall process (Lopez-  
98 Otin et al., 2013;Deleidi et al., 2015), cause and effect relationships between different processes  
99 and systems, including aging of the immune system (Montecino-Rodriguez et al., 2013),  
100 inflammation (Bruunsgaard et al., 2001;Sarkar and Fisher, 2006;Franceschi et al., 2007;Michaud  
101 et al., 2013), fibrosis (Cieslik et al., 2011;Kapetanaki et al., 2013), mineralization of connective  
102 tissue (Shindyapina et al., 2014), cellular senescence (van Deursen, 2014), wear and tear, and  
103 many others. In addition, many genetic and epigenetic changes implicated in aging and longevity  
104 are associated with aging in model organisms (Lombard et al., 2005;Moskalev et al., 2014). Even  
105 though their role and action in human aging are uncertain, many of these changes are also  
106 associated with human diseases (Kennedy et al., 2015; Aguilar-Olivos et al., 2015;De Rosa et al.,  
107 2015;Helling and Yang, 2015;Lardenoije et al., 2015;Renauer et al., 2015). Recent discoveries  
108 showing that mechanisms involved in cancer are also associated with the aging process have led  
109 to multiple proposals to prevent cancer and other age-related diseases using drugs that increase  
110 lifespan in model organisms (Blagosklonny, 2013;Zhavoronkov et al., 2014).

111

112 Surprisingly, aging shares many characteristics with Human Immunodeficiency Virus (HIV), as  
113 while having a specific ICD-10 code, HIV is the cause of many fatal diseases associated with a  
114 broad range of ICD-10 codes. However, unlike HIV, classifying aging as a disease is difficult  
115 because of the absence of a clear set of aging biomarkers and the uncertainty of the time of  
116 transition from loss of function to disease. There is some progress in this area; recent population  
117 statistics and studies clearly demonstrate the relationship of aging and increased risk of multiple  
118 diseases (Marengoni et al., 2011;Federal Interagency Forum on Aging-Related Statistics,  
119 2012;Salive, 2013), and there are several frailty indexes that measure the rate of physical decline  
120 and sets of aging biomarkers (Moreno-Villanueva et al.;Horvath, 2013). However, the transition  
121 from aging to disease remains unclear both at the individual and population levels (Figure 1).

122

## 123 **Public opinion and stakeholders' views on aging as a disease**

124

125 At the start of the twentieth century, most causes of death in advanced age were attributed to “old  
126 age” and “natural causes” (Moriyama et al., 2011). However, over the course of the twentieth  
127 century, the understanding of aging and disease changed (Shock et al., 1984;Bulterijs et al.,  
128 2015;Faragher, 2015), with many age-related diseases and causes of death being clearly defined  
129 (Vellas et al., 1992). Over time, many chronic diseases of old age previously considered to be a  
130 part of normal aging including hypertension, rheumatoid arthritis, cardiomyopathy, and  
131 osteoporosis received classification codes (Bennett et al., 1956;force, 1980;WHO, 1994).  
132 Historically, “old age” was among the acceptable causes of death and was used on death  
133 certificates (Moriyama et al., 2011). Most countries now provide guidelines limiting the use of  
134 the term on medical certificates by age and issuing recommendations to avoid using only “old  
135 age” as a cause of death (Office for National Statistics, 2010), since “terms such as senescence,  
136 infirmity, old age, and advanced age have little value for public health or medical research”  
137 (Centers for Disease Control, 2004). The same arguments are commonly used in debates against

138 classifying aging as a disease, as many stakeholders would prefer to have a more granular view  
139 into causes of death.

140  
141 To illustrate these differences in opinion about aging, a recent survey in Finland assessed  
142 stakeholders' perspectives on what constitutes a disease. The study surveyed 3,000 laypeople,  
143 1,500 doctors, 1,500 nurses and 200 parliament members and asked them to rate 60 "states of  
144 being" by their perception of disease. And while most cancers like breast cancer (#1) and  
145 prostate cancer (#2) were clearly classified as diseases, wrinkles (#60), smoking (#59) and  
146 ageing (#58) were not classified as diseases (Tikkinen et al., 2012). Most of the doctors and  
147 nurses did not consider sarcopenia, age-related muscle loss (#31) as a disease. Surprisingly,  
148 obesity (#50), was not considered to be a disease by any of the stakeholder groups even though it  
149 is now classified as a disease with multiple disease codes (E65-E68) in endocrine, nutritional and  
150 metabolic diseases (E00-E90), representing a considerable part of chapter IV in ICD-10 (World  
151 Health Organization, 2011). The case of obesity provides clues that the opinion of multiple  
152 stakeholders including medical, general public, doctors and nurses may deviate from the WHO  
153 consensus for the purposes of disease classification, and other stakeholders may play a larger  
154 role in forming ICD revisions.

155  
156 In another survey of pension funds, insurance companies, and employee benefits industries; only  
157 11% of respondents felt that aging is a disease and less than 22% used simulations involving  
158 biomedical advances in forecasting life expectancy (Zhavoronkov, 2015). Considering the  
159 relatively conservative responses, these stakeholder groups may not be in favor of classifying  
160 aging as a disease in the ICD-11 revision.

161  
162 The debate on whether aging should be classified as a disease is taking place primarily in  
163 academic circles (Ries, 1976;Glasser, 1986;Williams, 1987;Blumenthal, 1993;Callahan and  
164 Topinkova, 1998;Blumenthal, 2003;Faragher, 2015;Gems, 2015b) with no consensus opinion  
165 (Garber, 2008;Donmez and Guarente, 2010) and even some opposing views from  
166 biogerontologists (Ardeljan and Chan, 2013;Rattan, 2014). Even though some of these views aim  
167 at higher citation rating or other objectives, these opposing views do not propose concrete plans  
168 for addressing the aging problem at the level of WHO.

169  
170 Prior history with many mental disorders, including autism (Lord and Jones, 2012), demonstrates  
171 that classifying a state of being as a disease leads to an increased attention to the subject, the  
172 development of more accurate diagnostic methods, and increased involvement of the  
173 pharmaceutical industry and policy makers. It also provides the basis for clinical trials.

## 174 175 **Strategies in moving forward**

176  
177 *Large scale studies in humans.* There are many strategies that can be pursued to test the efficacy  
178 of geroprotectors in humans, including large scale publicly-funded supplement studies and  
179 studies designed to address a specific set of biomarkers of aging (Hefti and Bales, 2006;Le  
180 Couteur et al., 2012;Scott and DeFrancesco, 2015). The results from the Novartis RAD001 study  
181 in healthy elderly patients as a vaccine-potentiating agent (Mannick et al., 2014) elucidated the  
182 possibility of ameliorating immunosenescence in the elderly and raises the prospect of delaying  
183 the onset of age-related diseases.

184  
185 *Aging biomarkers.* Even though major advances have been made since the final ICD-10 meeting  
186 in tracking aging at all levels of organization (Sprott, 2010;Le Couteur et al., 2012;Hatse et al.,  
187 2014;Wu et al., 2015), there is no universal set of biomarkers and guidelines for measuring aging  
188 as a system. However, in order to successfully evaluate the effect of any drug that influences  
189 aging, it is essential have a measureable endpoint, such as biomarkers. Gerontologists have  
190 previously struggled to extrapolate biomarkers from animal models to humans (Butler et al.,  
191 2004). But with the advent of Big Data, it is now possible to track aging on the epigenetic level  
192 and measure accelerated aging in many diseases (Horvath et al., 2014;Horvath and Levine,  
193 2015). There are also promising studies of transcriptomic (Nakamura et al., 2012;Dhahbi, 2014),  
194 telomere-length (Zhang et al., 2014;Shamir, 2015) and multi-variate (Sanders et al., 2014) blood-  
195 based biomarkers that may lead to minimally invasive diagnostic tests. It is also possible to track  
196 signalome-level biomarkers . Recent studies have shown that signaling pathways found in aging  
197 are comparable to and share many characteristics with Hutchinson-Gilford Progeria Syndrome  
198 (HGPS) (Aliper et al., 2015) and Age-related Macular Degeneration (AMD) (Makarev et al.,  
199 2014). It is also possible to use system-wide biomarkers like heart rate variability (HRV) as  
200 biomarkers of aging (Corino et al., 2007). There is a rapidly growing body of evidence that  
201 biomarkers of aging contributes and is very similar to the many age-related diseases on all levels  
202 of organization and it is possible to multiplex epigenetic, transcriptomic, proteomic, signalomic,  
203 metabolomic, metagenomic and phenotypic biomarkers to track the progression of aging as a  
204 disease.

205  
206 Since the transition from age-associated processes to disease is unclear (Figure 1), in the absence  
207 of readily available and highly personalized biomarkers, one of the approaches to set the gold  
208 standard for health, is to select the age when peak performance is observed in the majority of the  
209 population. There are conflicting theories without convincing empirical evidence that the human  
210 skeleton stops growing at approximately the age of 20 (Nilsson et al., 2005). Peak age for  
211 athletic performance depends upon sports disciplines and is usually in the range of 20-30 years  
212 with younger age of peak performance in short distance races and gradually increasing age of  
213 peak performance in longer racing distances (Elmenshawy et al., 2015). In prenatal diagnostics,  
214 statistics for Down's and other chromosomal abnormalities led to recommendations for invasive  
215 prenatal screening after 35, which is generally referred to as advanced maternal age, procedures  
216 that have gradually been replaced by non-invasive prenatal procedures. (Chiu et al., 2009;Nakata  
217 et al., 2010;Benn et al., 2013;Lo, 2013;Nepomnyashchaya et al., 2013;Twiss et al.,  
218 2014;Neufeld-Kaiser et al., 2015).



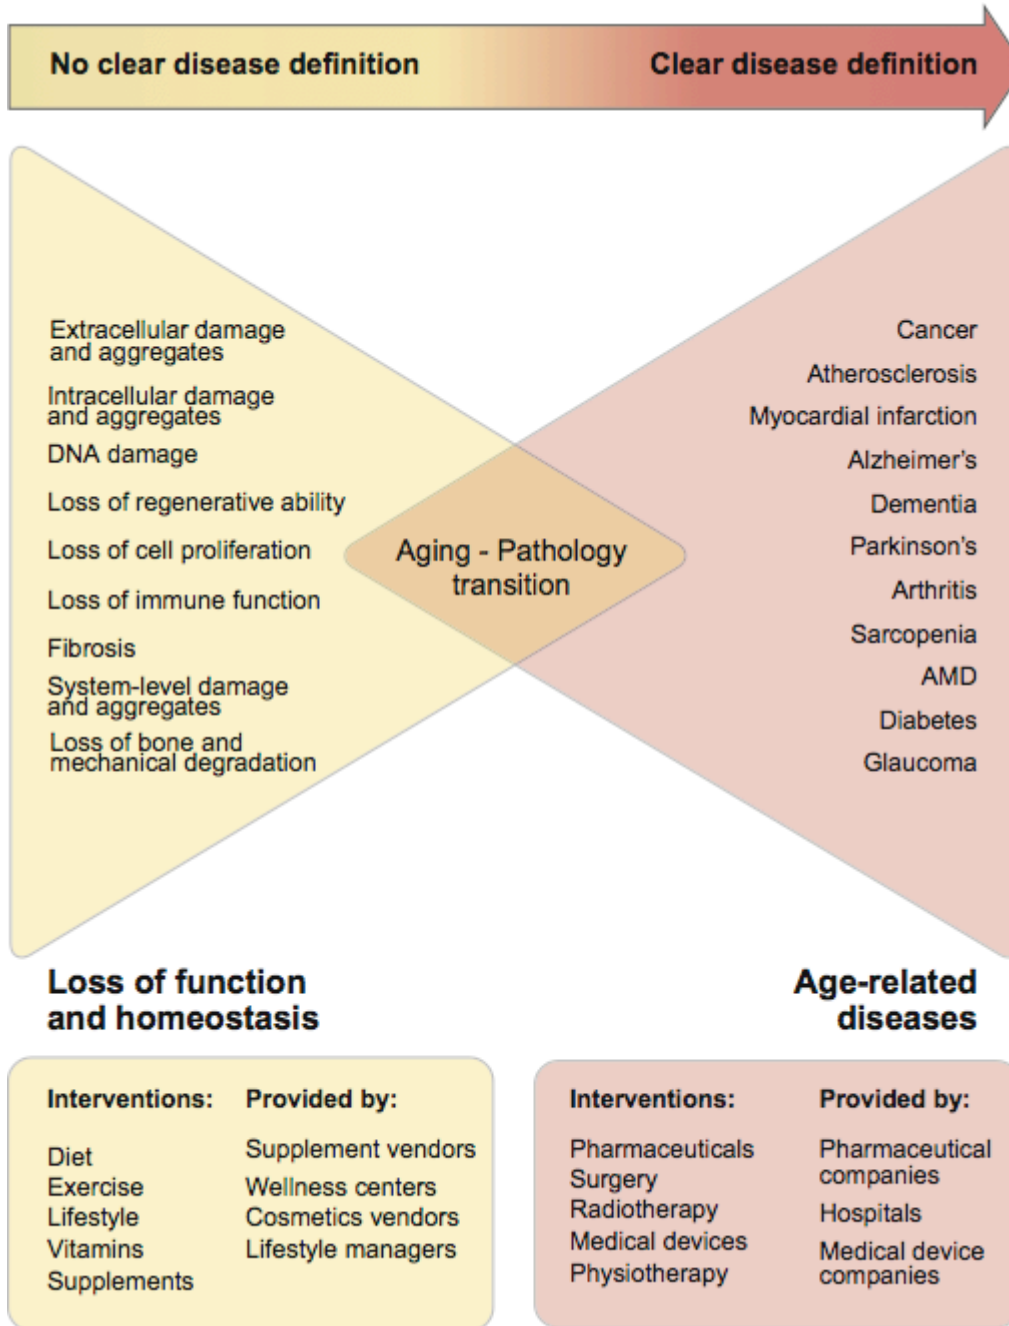

219  
220

221 **Figure 1:** Gradual transition from the loss of function and homeostasis due to aging into age-  
222 related pathologies. It is clear that with time the combination of many age-related processes  
223 becomes more granular and crystallizes into specific diseases. However, it is unclear when aging  
224 starts and when the transition between aging and pathology occurs.

225

## 226 Discussion

227

228 Many scientists throughout the world have argued that aging should be classified as a disease  
229 (Bulterijs et al., 2015; Gems, 2015a). The recent decision of the Food and Drug Administration

230 (FDA) to test the potential of metformin in reducing risk of developing age-related conditions  
231 including cancer, heart disease and cognitive impairment resonated in the community, increased  
232 attention to the field, and suggested that aging may be an indication appropriate for clinical trials  
233 (Check Hayden, 2015). However, there are no visible global or national efforts to include aging  
234 in the ICD-11 classification as a disease. This is primarily due to the structure and clear  
235 separation of the supplement and wellness markets and disease treatment markets. Stakeholders  
236 in the wellness market are selling billions of dollars worth of goods and services and are not  
237 interested in increased regulation. Also, the structure of the supplement market, where large  
238 ingredient vendors supply product to compounders that in turn supply brand holders that sell  
239 through distribution networks, does not provide incentives or ability at any level to engage in  
240 discussions with policy makers.

241  
242 As demonstrated in Figure 1, individual consumers of healthcare cannot formulate the demand  
243 for evidence-based medicine (pharmaceuticals) to combat aging and rely on the less-regulated  
244 wellness and alternative medicine industry. The fact that the supplement industry is prosperous,  
245 with a total estimated sale of \$36.7 billion in the US in 2014, implies that there is consumer  
246 demand for anti-aging treatments (Nutrition Business Journal, 2015). Increasing regulation of the  
247 supplements and wellness industry may lead to more demand and a supply of evidence-based  
248 approaches to interventions in aging.

249  
250 Increasing productive longevity in the developed countries is likely to reduce healthcare costs,  
251 boost employee productivity and lead to substantial economic growth (Zhavoronkov and  
252 Litovchenko, 2013), while the inability to increase productive longevity quickly may result in  
253 economic collapse (Zhavoronkov et al., 2012). Yet when it comes to aging, policy makers, the  
254 general public, and even pension funds lack the sense of urgency to address it as a curable  
255 disease (Zhavoronkov, 2015) even though there is a growing realization of the likely economic  
256 problems (Zhavoronkov, 2013). Even some of the most reputable demographers, gerontologists  
257 and biogerontologists express conflicting opinions on the subject, providing arguments against  
258 classifying aging as a disease. While these papers promote debate and increase their citation  
259 ratings, they are certainly not helpful for making the case for formal classification of aging as a  
260 disease or family of diseases. Formal classification of aging as a disease is likely to unite both  
261 scientists and medical practitioners in this effort.

262  
263 There are also ethical considerations associated with classifying aging as a disease (Caplan,  
264 2005). A large portion of the population may feel uncomfortable with the idea and resist being  
265 classified as disease carriers either at birth or after a specific age certain age while lacking clear  
266 representation of a disease. However, the recent inclusion of obesity in ICD-10 has shown that it  
267 not only helped to attract resources to research, but it also resulted in more frequent diagnosis of  
268 the condition. Since obesity has been classified as a disease, it is now easier for medical  
269 practitioners to convince patients to pursue healthier lifestyles and prescribe medication, even in  
270 cases where patients are comfortable with the condition.

## 271 272 **Recommendations for Implementation**

273  
274 *Form a task force.* As part of the upcoming ICD-11, the International Association for the Study  
275 of Pain (IASP) Task Force was created to classify chronic pain as a disease (Treede et al., 2015),

276 with a clear organizational structure to interact with the WHO to create a classification system of  
277 all manifestations of chronic pain, resulting in 7 categories: musculoskeletal pain, visceral pain,  
278 headache, neuropathic pain, post surgical and posttraumatic pain, cancer pain and primary pain.  
279 A similar task force should be created to interact with the WHO on the classification of aging.

280  
281 *Develop an “ideal norm.”* Despite the growing abundance of biomarkers of aging, classifying  
282 aging as a disease will be challenging due to the absence of the “ideal norm.” Despite significant  
283 effort from the academic and industry communities, sarcopenia is still not classified as a disease  
284 despite clear clinical and molecular representation and similarity with premature musculoskeletal  
285 aging and myotonic disorders (Cruz-Jentoft et al., 2010; Muscaritoli et al., 2010; Fielding et al.,  
286 2011; Morley et al., 2011; Mateos-Aierdi et al., 2015). One approach to address this challenge is  
287 to assume an “ideal” disease-free physiological state at a certain age, for example, 25 years of  
288 age, and develop a set of interventions to keep the patients as close to that state as possible.  
289 Considering the WHO definition of health, it may be possible to agree on the optimal set of  
290 biomarkers that would be characteristic to the “state of complete physical, mental and social  
291 well-being, not merely the absence of infirmity” and agree on the physiological threshold after  
292 which the net totality of deviation of these biomarkers from norm can be considered a disease.

293  
294 *Set effective metrics.* When performing cost-effectiveness analysis (CBA), economists often  
295 evaluate the outcomes of various programs in terms of the quality-adjusted life years (QALYs)  
296 and healthy-years equivalent (HYE) (Mehrez and Gafni, 1989). The most effective altruistic  
297 causes are now also evaluated using these metrics (Macaskill, 2015). Studies also demonstrate  
298 that each QALY can be valued at \$24,777 to \$428,286 depending on the method (Hirth et al.,  
299 2000). Many projects in aging research do not result in QALY and are currently not prioritized to  
300 maximize healthy lifespan (Zhavoronkov, 2013). Classifying aging as a disease would facilitate  
301 the development of programs and prioritize projects in aging research that maximize QALY and  
302 HYE today and in the future.

## 303 304 **Conclusion**

305  
306 There are definite benefits for many stakeholders in having aging classified as a disease, and the  
307 research community should consider uniting and working as a single voice to increase the chance  
308 of having aging classified as a disease by the WHO.

309  
310  
311  
312  
313  
314  
315  
316  
317  
318  
319  
320  
321



322  
323  
324  
325  
326  
327  
328  
329  
330  
331  
332  
333  
334  
335  
336  
337  
338  
339  
340  
341  
342  
343  
344  
345  
346  
347  
348  
349  
350  
351  
352  
353  
354  
355  
356  
357  
358  
359  
360  
361  
362  
363  
364  
365  
366

## Acknowledgements

We would like to thank Hantamalala Ralay Ranaivo for reviewing and editing this manuscript.

## References

- Aguilar-Olivos, N.E., Oria-Hernandez, J., Chavez-Tapia, N.C., Uribe, M., and Mendez-Sanchez, N. (2015). The Role of Epigenetics in the Progression of Non-Alcoholic Fatty Liver Disease. *Mini Rev Med Chem*.
- Aliper, A.M., Csoka, A.B., Buzdin, A., Jetka, T., Roumiantsev, S., Moskalev, A., and Zhavoronkov, A. (2015). Signaling pathway activation drift during aging: Hutchinson-Gilford Progeria Syndrome fibroblasts are comparable to normal middle-age and old-age cells. *Aging (Albany NY)* 7, 26-37.
- American Medical Association (1961). "Standard Nomenclature of Diseases and Operations", in: *National Conference on Medical Nomenclature (U.S.)*. American Medical Association).
- Ardeljan, D., and Chan, C.C. (2013). Aging is not a disease: distinguishing age-related macular degeneration from aging. *Prog Retin Eye Res* 37, 68-89. doi: 10.1016/j.preteyeres.2013.07.003.
- Benn, P., Cuckle, H., and Pergament, E. (2013). Non-invasive prenatal testing for aneuploidy: current status and future prospects. *Ultrasound Obstet Gynecol* 42, 15-33. doi: 10.1002/uog.12513.
- Bennett, G.A., Cobb, S., Jacox, R., Jessar, R.A., and Ropes, M.W. (1956). Proposed diagnostic criteria for rheumatoid arthritis. *Bull Rheum Dis* 7, 121-124.
- Bircher, J. (2005). Towards a dynamic definition of health and disease. *Med Health Care Philos* 8, 335-341. doi: 10.1007/s11019-005-0538-y.
- Blagosklonny, M.V. (2013). Selective anti-cancer agents as anti-aging drugs. *Cancer Biol Ther* 14, 1092-1097. doi: 10.4161/cbt.27350.
- Blumenthal, H.T. (1993). The aging-disease dichotomy is alive, but is it well? *J Am Geriatr Soc* 41, 1272-1273.
- Blumenthal, H.T. (2003). The aging-disease dichotomy: true or false? *J Gerontol A Biol Sci Med Sci* 58, 138-145.
- Bruunsgaard, H., Pedersen, M., and Pedersen, B.K. (2001). Aging and proinflammatory cytokines. *Curr Opin Hematol* 8, 131-136.
- Bulterijs, S., Hull, R.S., Bjork, V.C., and Roy, A.G. (2015). It is time to classify biological aging as a disease. *Front Genet* 6, 205. doi: 10.3389/fgene.2015.00205.
- Butler, R.N., Sprott, R., Warner, H., Bland, J., Feuers, R., Forster, M., Fillit, H., Harman, S.M., Hewitt, M., Hyman, M., Johnson, K., Kligman, E., McClearn, G., Nelson, J., Richardson, A., Sonntag, W., Weindruch, R., and Wolf, N. (2004). Biomarkers of aging: from primitive organisms to humans. *J Gerontol A Biol Sci Med Sci* 59, B560-567.
- Callahan, D., and Topinkova, E. (1998). Is aging a preventable or curable disease? *Drugs Aging* 13, 93-97.
- Caplan, A.L. (2005). Death as an unnatural process. Why is it wrong to seek a cure for aging? *EMBO Rep* 6 Spec No, S72-75. doi: 10.1038/sj.embor.7400435.

- 367 Centers for Disease Control (2004). "Instructions for Completing the Cause-of-Death Section of  
368 the Death Certificate".)
- 369 Check Hayden, E. (2015). Anti-ageing pill pushed as bona fide drug. *Nature* 522, 265-266. doi:  
370 10.1038/522265a.
- 371 Chiu, R.W., Cantor, C.R., and Lo, Y.M. (2009). Non-invasive prenatal diagnosis by single  
372 molecule counting technologies. *Trends Genet* 25, 324-331. doi:  
373 10.1016/j.tig.2009.05.004.
- 374 Cieslik, K.A., Taffet, G.E., Carlson, S., Hermosillo, J., Trial, J., and Entman, M.L. (2011).  
375 Immune-inflammatory dysregulation modulates the incidence of progressive fibrosis and  
376 diastolic stiffness in the aging heart. *J Mol Cell Cardiol* 50, 248-256. doi:  
377 10.1016/j.yjmcc.2010.10.019.
- 378 Corino, V.D., Matteucci, M., and Mainardi, L.T. (2007). Analysis of heart rate variability to  
379 predict patient age in a healthy population. *Methods Inf Med* 46, 191-195.
- 380 Cruz-Jentoft, A.J., Baeyens, J.P., Bauer, J.M., Boirie, Y., Cederholm, T., Landi, F., Martin, F.C.,  
381 Michel, J.P., Rolland, Y., Schneider, S.M., Topinkova, E., Vandewoude, M., and  
382 Zamboni, M. (2010). Sarcopenia: European consensus on definition and diagnosis:  
383 Report of the European Working Group on Sarcopenia in Older People. *Age Ageing* 39,  
384 412-423. doi: 10.1093/ageing/afq034.
- 385 Cullen, W. (1816). *A Synopsis of Nosology by William Cullen ... Translated from the Latin, with*  
386 *references to the best authors who have written since his time, by John Thompson.* .  
387 Thomas Dobson.
- 388 De Rosa, M., Pace, U., Rega, D., Costabile, V., Duraturo, F., Izzo, P., and Delrio, P. (2015).  
389 Genetics, diagnosis and management of colorectal cancer (Review). *Oncol Rep*. doi:  
390 10.3892/or.2015.4108.
- 391 Deleidi, M., Jaggie, M., and Rubino, G. (2015). Immune aging, dysmetabolism, and  
392 inflammation in neurological diseases. *Front Neurosci* 9, 172. doi:  
393 10.3389/fnins.2015.00172.
- 394 Dhahbi, J.M. (2014). Circulating small noncoding RNAs as biomarkers of aging. *Ageing Res Rev*  
395 17, 86-98. doi: 10.1016/j.arr.2014.02.005.
- 396 Donmez, G., and Guarente, L. (2010). Aging and disease: connections to sirtuins. *Aging Cell* 9,  
397 285-290. doi: 10.1111/j.1474-9726.2010.00548.x.
- 398 Elmenshawy, A. R., Machin, D. R., & Tanaka, H. (2015). A rise in peak performance age in  
399 female athletes. *AGE*, 37(3), 1-8.
- 400 Faragher, R.G.A. (2015). Should we treat ageing as a disease? The consequences and dangers of  
401 miscategorisation. *Frontiers in Genetics* 6. doi: 10.3389/fgene.2015.00171.
- 402 Federal Interagency Forum on Aging-Related Statistics (2012). "Older Americans 2012: Key  
403 Indicators of Well-Being". Federal Interagency Forum on Aging-Related Statistics.,).
- 404 Fielding, R.A., Vellas, B., Evans, W.J., Bhasin, S., Morley, J.E., Newman, A.B., Abellan Van  
405 Kan, G., Andrieu, S., Bauer, J., Breuille, D., Cederholm, T., Chandler, J., De Meynard,  
406 C., Donini, L., Harris, T., Kannt, A., Keime Guibert, F., Onder, G., Papanicolaou, D.,  
407 Rolland, Y., Rooks, D., Sieber, C., Souhami, E., Verlaan, S., and Zamboni, M. (2011).  
408 Sarcopenia: an undiagnosed condition in older adults. Current consensus definition:  
409 prevalence, etiology, and consequences. International working group on sarcopenia. *J Am*  
410 *Med Dir Assoc* 12, 249-256. doi: 10.1016/j.jamda.2011.01.003.

- 411 First, M.B., Reed, G.M., Hyman, S.E., and Saxena, S. (2015). The development of the ICD-11  
412 Clinical Descriptions and Diagnostic Guidelines for Mental and Behavioural Disorders.  
413 *World Psychiatry* 14, 82-90. doi: 10.1002/wps.20189.
- 414 Force, W.I.T. (1980). Report of the WHO/ISFC task force on the definition and classification of  
415 cardiomyopathies. *British Heart Journal* 44, 672-673.
- 416 Franceschi, C., Capri, M., Monti, D., Giunta, S., Olivieri, F., Sevini, F., Panourgia, M.P., Invidia,  
417 L., Celani, L., Scurti, M., Cevenini, E., Castellani, G.C., and Salvioli, S. (2007).  
418 Inflammaging and anti-inflammaging: a systemic perspective on aging and longevity  
419 emerged from studies in humans. *Mech Ageing Dev* 128, 92-105. doi:  
420 10.1016/j.mad.2006.11.016.
- 421 Garber, K. (2008). A mid-life crisis for aging theory. *Nat Biotechnol* 26, 371-374. doi:  
422 10.1038/nbt0408-371.
- 423 Gems, D. (2015a). The aging-disease false dichotomy: understanding senescence as pathology.  
424 *Front Genet* 6, 212. doi: 10.3389/fgene.2015.00212.
- 425 Gems, D. (2015b). The aging-disease false dichotomy: understanding senescence as pathology.  
426 *Frontiers in Genetics* 6. doi: 10.3389/fgene.2015.00212.
- 427 Glasser, M. (1986). Toward a unified theory of disease: understanding the aging process. *Med*  
428 *Hypotheses* 20, 385-391.
- 429 Hatse, S., Brouwers, B., Dalmaso, B., Laenen, A., Kenis, C., Schoffski, P., and Wildiers, H.  
430 (2014). Circulating MicroRNAs as easy-to-measure aging biomarkers in older breast  
431 cancer patients: correlation with chronological age but not with fitness/frailty status.  
432 *PLoS One* 9, e110644. doi: 10.1371/journal.pone.0110644.
- 433 Hefti, F.F., and Bales, R. (2006). Regulatory issues in aging pharmacology. *Aging Cell* 5, 3-8.  
434 doi: 10.1111/j.1474-9726.2006.00193.x.
- 435 Helling, B.A., and Yang, I.V. (2015). Epigenetics in lung fibrosis: from pathobiology to  
436 treatment perspective. *Curr Opin Pulm Med* 21, 454-462. doi:  
437 10.1097/mcp.0000000000000191.
- 438 Hirth, R.A., Chernew, M.E., Miller, E., Fendrick, A.M., and Weissert, W.G. (2000). Willingness  
439 to pay for a quality-adjusted life year: in search of a standard. *Med Decis Making* 20,  
440 332-342.
- 441 Horvath, S. (2013). DNA methylation age of human tissues and cell types. *Genome Biol* 14,  
442 R115. doi: 10.1186/gb-2013-14-10-r115.
- 443 Horvath, S., Erhart, W., Brosch, M., Ammerpohl, O., Von Schonfels, W., Ahrens, M., Heits, N.,  
444 Bell, J.T., Tsai, P.C., Spector, T.D., Deloukas, P., Siebert, R., Sipos, B., Becker, T.,  
445 Rocken, C., Schafmayer, C., and Hampe, J. (2014). Obesity accelerates epigenetic aging  
446 of human liver. *Proc Natl Acad Sci U S A* 111, 15538-15543. doi:  
447 10.1073/pnas.1412759111.
- 448 Horvath, S., and Levine, A.J. (2015). HIV-1 Infection Accelerates Age According to the  
449 Epigenetic Clock. *J Infect Dis*. doi: 10.1093/infdis/jiv277.
- 450 Huber, M., Knottnerus, J.A., Green, L., Van Der Horst, H., Jadad, A.R., Kromhout, D., Leonard,  
451 B., Lorig, K., Loureiro, M.I., Van Der Meer, J.W., Schnabel, P., Smith, R., Van Weel, C.,  
452 and Smid, H. (2011). How should we define health? *Bmj* 343, d4163. doi:  
453 10.1136/bmj.d4163.
- 454 Kapetanaki, M.G., Mora, A.L., and Rojas, M. (2013). Influence of age on wound healing and  
455 fibrosis. *J Pathol* 229, 310-322. doi: 10.1002/path.4122.

- 456 Katschnig, H. (2010). Are psychiatrists an endangered species? Observations on internal and  
457 external challenges to the profession. *World Psychiatry* 9, 21-28.
- 458 Kennedy, B. K., Berger, S. L., Brunet, A., Campisi, J., Cuervo, A. M., Epel, E. S., ... & Sierra, F.  
459 (2014). Geroscience: linking aging to chronic disease. *Cell*,159(4), 709-713.
- 460 Lardenoije, R., Iatrou, A., Kenis, G., Kompotis, K., Steinbusch, H.W., Mastroeni, D., Coleman,  
461 P., Lemere, C.A., Hof, P.R., Van Den Hove, D.L., and Rutten, B.P. (2015). The  
462 epigenetics of aging and neurodegeneration. *Prog Neurobiol* 131, 21-64. doi:  
463 10.1016/j.pneurobio.2015.05.002.
- 464 Le Couteur, D.G., Mclachlan, A.J., Quinn, R.J., Simpson, S.J., and De Cabo, R. (2012). Aging  
465 biology and novel targets for drug discovery. *J Gerontol A Biol Sci Med Sci* 67, 168-174.  
466 doi: 10.1093/gerona/qlr095.
- 467 Lo, Y.M. (2013). Non-invasive prenatal testing using massively parallel sequencing of maternal  
468 plasma DNA: from molecular karyotyping to fetal whole-genome sequencing. *Reprod*  
469 *Biomed Online* 27, 593-598. doi: 10.1016/j.rbmo.2013.08.008.
- 470 Lombard, D.B., Chua, K.F., Mostoslavsky, R., Franco, S., Gostissa, M., and Alt, F.W. (2005).  
471 DNA Repair, Genome Stability, and Aging. *Cell* 120, 497-512. doi:  
472 <http://dx.doi.org/10.1016/j.cell.2005.01.028>.
- 473 Lopez-Otin, C., Blasco, M.A., Partridge, L., Serrano, M., and Kroemer, G. (2013). The  
474 hallmarks of aging. *Cell* 153, 1194-1217. doi: 10.1016/j.cell.2013.05.039.
- 475 Lord, C., and Jones, R.M. (2012). Annual research review: re-thinking the classification of  
476 autism spectrum disorders. *J Child Psychol Psychiatry* 53, 490-509. doi: 10.1111/j.1469-  
477 7610.2012.02547.x.
- 478 Macaskill, W. (2015). *Doing Good Better: Effective Altruism and How You Can Make a*  
479 *Difference*. Penguin Publishing Group.
- 480 Makarev, E., Cantor, C., Zhavoronkov, A., Buzdin, A., Aliper, A., and Csoka, A.B. (2014).  
481 Pathway activation profiling reveals new insights into age-related macular degeneration  
482 and provides avenues for therapeutic interventions. *Aging (Albany NY)* 6, 1064-1075.
- 483 Mannick, J.B., Del Giudice, G., Lattanzi, M., Valiante, N.M., Praestgaard, J., Huang, B.,  
484 Lonetto, M.A., Maecker, H.T., Kovarik, J., Carson, S., Glass, D.J., and Klickstein, L.B.  
485 (2014). mTOR inhibition improves immune function in the elderly. *Sci Transl Med* 6,  
486 268ra179. doi: 10.1126/scitranslmed.3009892.
- 487 Marengoni, A., Angleman, S., Melis, R., Mangialasche, F., Karp, A., Garmen, A., Meinow, B.,  
488 and Fratiglioni, L. (2011). Aging with multimorbidity: a systematic review of the  
489 literature. *Ageing Res Rev* 10, 430-439. doi: 10.1016/j.arr.2011.03.003.
- 490 Mateos-Aierdi, A.J., Goicoechea, M., Aiastui, A., Fernandez-Torron, R., Garcia-Puga, M.,  
491 Matheu, A., and De Munain, A.L. (2015). Muscle wasting in myotonic dystrophies: a  
492 model of premature aging. *Front Aging Neurosci* 7, 125. doi: 10.3389/fnagi.2015.00125.
- 493 Mehrez, A., and Gafni, A. (1989). Quality-adjusted life years, utility theory, and healthy-years  
494 equivalents. *Med Decis Making* 9, 142-149.
- 495 Michaud, M., Balardy, L., Moulis, G., Gaudin, C., Peyrot, C., Vellas, B., Cesari, M., and  
496 Nourhashemi, F. (2013). Proinflammatory cytokines, aging, and age-related diseases. *J*  
497 *Am Med Dir Assoc* 14, 877-882. doi: 10.1016/j.jamda.2013.05.009.
- 498 Montecino-Rodriguez, E., Berent-Maoz, B., and Dorshkind, K. (2013). Causes, consequences,  
499 and reversal of immune system aging. *J Clin Invest* 123, 958-965. doi: 10.1172/jci64096.
- 500 Moreno-Villanueva, M., Capri, M., Breusing, N., Siepelmeyer, A., Sevini, F., Ghezzi, A., Craen,  
501 A.J.M.D., Hervonen, A., Hurme, M., Schön, C., Grune, T., Franceschi, C., and Bürkle, A.



- 502 MARK-AGE standard operating procedures (SOPs): A successful effort. *Mechanisms of*  
503 *Ageing and Development*. doi: <http://dx.doi.org/10.1016/j.mad.2015.03.007>.
- 504 Moriyama, I.M., Loy, R.M., and Robb-Smith, A.H.T. (2011). *History of the Statistical*  
505 *Classification of Diseases and Causes of Death*. U.S. Department of Health and Human  
506 Services, Centers for Disease Control and Prevention, National Center for Health  
507 Statistics.
- 508 Morley, J.E., Abbatecola, A.M., Argiles, J.M., Baracos, V., Bauer, J., Bhasin, S., Cederholm, T.,  
509 Coats, A.J., Cummings, S.R., Evans, W.J., Fearon, K., Ferrucci, L., Fielding, R.A.,  
510 Guralnik, J.M., Harris, T.B., Inui, A., Kalantar-Zadeh, K., Kirwan, B.A., Mantovani, G.,  
511 Muscaritoli, M., Newman, A.B., Rossi-Fanelli, F., Rosano, G.M., Roubenoff, R.,  
512 Schambelan, M., Sokol, G.H., Storer, T.W., Vellas, B., Von Haehling, S., Yeh, S.S., and  
513 Anker, S.D. (2011). Sarcopenia with limited mobility: an international consensus. *J Am*  
514 *Med Dir Assoc* 12, 403-409. doi: 10.1016/j.jamda.2011.04.014.
- 515 Moskalev, A.A., Aliper, A.M., Smit-Mcbride, Z., Buzdin, A., and Zhavoronkov, A. (2014).  
516 Genetics and epigenetics of aging and longevity. *Cell Cycle* 13, 1063-1077. doi:  
517 10.4161/cc.28433.
- 518 Muscaritoli, M., Anker, S.D., Argiles, J., Aversa, Z., Bauer, J.M., Biolo, G., Boirie, Y., Bosaeus,  
519 I., Cederholm, T., Costelli, P., Fearon, K.C., Laviano, A., Maggio, M., Rossi Fanelli, F.,  
520 Schneider, S.M., Schols, A., and Sieber, C.C. (2010). Consensus definition of sarcopenia,  
521 cachexia and pre-cachexia: joint document elaborated by Special Interest Groups (SIG)  
522 "cachexia-anorexia in chronic wasting diseases" and "nutrition in geriatrics". *Clin Nutr*  
523 29, 154-159. doi: 10.1016/j.clnu.2009.12.004.
- 524 Nakamura, S., Kawai, K., Takeshita, Y., Honda, M., Takamura, T., Kaneko, S., Matoba, R., and  
525 Matsubara, K. (2012). Identification of blood biomarkers of aging by transcript profiling  
526 of whole blood. *Biochem Biophys Res Commun* 418, 313-318. doi:  
527 10.1016/j.bbrc.2012.01.018.
- 528 Nakata, N., Wang, Y., and Bhatt, S. (2010). Trends in prenatal screening and diagnostic testing  
529 among women referred for advanced maternal age. *Prenat Diagn* 30, 198-206. doi:  
530 10.1002/pd.2434.
- 531 National Conference on Nomenclature of Disease (1933). "A standard classified nomenclature of  
532 diseases", in: *National Conference on Nomenclature of Disease*. (ed.) H. Logie. (New  
533 York: Commonwealth Fund).
- 534 Nepomnyashchaya, Y.N., Artemov, A.V., Roumiantsev, S.A., Roumyantsev, A.G., and  
535 Zhavoronkov, A. (2013). Non-invasive prenatal diagnostics of aneuploidy using next-  
536 generation DNA sequencing technologies, and clinical considerations. *Clin Chem Lab*  
537 *Med* 51, 1141-1154. doi: 10.1515/cclm-2012-0281.
- 538 Neufeld-Kaiser, W.A., Cheng, E.Y., and Liu, Y.J. (2015). Positive predictive value of non-  
539 invasive prenatal screening for fetal chromosome disorders using cell-free DNA in  
540 maternal serum: independent clinical experience of a tertiary referral center. *BMC Med*  
541 13, 129. doi: 10.1186/s12916-015-0374-8.
- 542 Nilsson, O., & Baron, J. (2005). Impact of growth plate senescence on catch-up growth and  
543 epiphyseal fusion. *Pediatric nephrology*, 20(3), 319-322.
- 544 Nutrition Business Journal (2015). "NBJ's Supplement Business Report 2015").
- 545 Office for National Statistics (2010). *Guidance for doctors completing Medical Certificates of*  
546 *Cause of Death in England and Wales* [Online]. [Accessed August 06, 2015].



- 547 Rattan, S.I. (2014). Aging is not a disease: implications for intervention. *Aging Dis* 5, 196-202.  
548 doi: 10.14336/ad.2014.0500196.
- 549 Renauer, P., Coit, P., and Sawalha, A.H. (2015). Epigenetics and Vasculitis: a Comprehensive  
550 Review. *Clin Rev Allergy Immunol*. doi: 10.1007/s12016-015-8495-6.
- 551 Reznek, L. (1987). *The Nature of Disease*. Routledge & Kegan Paul.
- 552 Ries, W. (1976). [The relations between aging and disease]. *Z Gesamte Inn Med* 31, 85-89.
- 553 Robb-Smith, A. (1969). A history of the college's 6. nomenclature of diseases: Its preparation.  
554 *Journal of the Royal College of Physicians* 3, 341-358.
- 555 Salive, M.E. (2013). Multimorbidity in older adults. *Epidemiol Rev* 35, 75-83. doi:  
556 10.1093/epirev/mxs009.
- 557 Sanders, J.L., Ding, V., Arnold, A.M., Kaplan, R.C., Cappola, A.R., Kizer, J.R., Boudreau, R.M.,  
558 Cushman, M., and Newman, A.B. (2014). Do changes in circulating biomarkers track  
559 with each other and with functional changes in older adults? *J Gerontol A Biol Sci Med*  
560 *Sci* 69, 174-181. doi: 10.1093/gerona/glt088.
- 561 Saracci, R. (1997). The World Health Organisation needs to reconsider its definition of health.  
562 *Bmj* 314, 1409-1410.
- 563 Sarkar, D., and Fisher, P.B. (2006). Molecular mechanisms of aging-associated inflammation.  
564 *Cancer Letters* 236, 13-23. doi: <http://dx.doi.org/10.1016/j.canlet.2005.04.009>.
- 565 Scott, C.T., and DeFrancesco, L. (2015). Selling long life. *Nat Biotech* 33, 31-40. doi:  
566 10.1038/nbt.3108.
- 567 Scully, J.L. (2004). What is a disease? *EMBO Rep* 5, 650-653. doi: 10.1038/sj.embor.7400195.
- 568 Shamir, L. (2015). Composite Aging Markers Can Be Used for Quantitative Profiling of Aging.  
569 *Gerontology*. doi: 10.1159/000433466.
- 570 Shindyapina, A.V., Mkrtychyan, G.V., Gneteeva, T., Buiuceli, S., Tancowny, B., Kulka, M.,  
571 Aliper, A., and Zhavoronkov, A. (2014). Mineralization of the connective tissue: a  
572 complex molecular process leading to age-related loss of function. *Rejuvenation Res* 17,  
573 116-133. doi: 10.1089/rej.2013.1475.
- 574 Shock, N., Greulich, R., Andres, R., Arenberg, D., Costa, P., Lakatta, E., and Tobin, J. (1984).  
575 "Normal Human Aging: The Baltimore Longitudinal Study of Aging". (Washington,  
576 D.C: Government Printing Office).
- 577 Sprott, R.L. (2010). Biomarkers of aging and disease: introduction and definitions. *Exp Gerontol*  
578 45, 2-4. doi: 10.1016/j.exger.2009.07.008.
- 579 Tikkinen, K.A., Leinonen, J.S., Guyatt, G.H., Ebrahim, S., and Jarvinen, T.L. (2012). What is a  
580 disease? Perspectives of the public, health professionals and legislators. *BMJ Open* 2.  
581 doi: 10.1136/bmjopen-2012-001632.
- 582 Treede, R.D., Rief, W., Barke, A., Aziz, Q., Bennett, M.I., Benoliel, R., Cohen, M., Evers, S.,  
583 Finnerup, N.B., First, M.B., Giamberardino, M.A., Kaasa, S., Kosek, E., Lavand'homme,  
584 P., Nicholas, M., Perrot, S., Scholz, J., Schug, S., Smith, B.H., Svensson, P., Vlaeyen,  
585 J.W., and Wang, S.J. (2015). A classification of chronic pain for ICD-11. *Pain* 156,  
586 1003-1007. doi: 10.1097/j.pain.000000000000160.
- 587 Twiss, P., Hill, M., Daley, R., and Chitty, L.S. (2014). Non-invasive prenatal testing for Down  
588 syndrome. *Semin Fetal Neonatal Med* 19, 9-14. doi: 10.1016/j.siny.2013.10.003.
- 589 Van Deursen, J.M. (2014). The role of senescent cells in ageing. *Nature* 509, 439-446. doi:  
590 10.1038/nature13193.

- 591 Vellas, B.J., Albarede, J.L., and Garry, P.J. (1992). Diseases and aging: patterns of morbidity  
592 with age; relationship between aging and age-associated diseases. *Am J Clin Nutr* 55,  
593 1225s-1230s.
- 594 Who (1994). "Assessment of Fracture Risk and its Application to Screening for Postmenopausal  
595 Osteoporosis". (Geneva: WHO).
- 596 Williams, T.F. (1987). Aging or disease? *Clin Pharmacol Ther* 42, 663-665.
- 597 World Health Organization (1948). "Constitution of the World Health Organization". (Geneva).
- 598 World Health Organization (1992). "The ICD-10 classification of mental and behavioural  
599 disorders: clinical descriptions and diagnostic guidelines". (Geneva: World Health  
600 Organization).
- 601 World Health Organization (2006). "History of the development of the ICD". World Health  
602 Organization).
- 603 World Health Organization (2011). *International statistical classification of diseases and related  
604 health problems. - 10th revision, edition 2010*. Geneva: World Health Organization.
- 605 Wu, I.C., Lin, C.C., and Hsiung, C.A. (2015). Emerging roles of frailty and inflammaging in risk  
606 assessment of age-related chronic diseases in older adults: the intersection between aging  
607 biology and personalized medicine. *Biomedicine (Taipei)* 5, 1. doi: 10.7603/s40681-015-  
608 0001-1.
- 609 Zhang, W.G., Zhu, S.Y., Bai, X.J., Zhao, D.L., Jian, S.M., Li, J., Li, Z.X., Fu, B., Cai, G.Y., Sun,  
610 X.F., and Chen, X.M. (2014). Select aging biomarkers based on telomere length and  
611 chronological age to build a biological age equation. *Age (Dordr)* 36, 9639. doi:  
612 10.1007/s11357-014-9639-y.
- 613 Zhavoronkov, A. (2013). *The Ageless Generation: How Advances in Biomedicine Will  
614 Transform the Global Economy*. St. Martin's Press.
- 615 Zhavoronkov, A. (2015). Longevity expectations in the pension fund, insurance, and employee  
616 benefits industries. *Psychol Res Behav Manag* 8, 27-39. doi: 10.2147/prbm.s75440.
- 617 Zhavoronkov, A., Buzdin, A.A., Garazha, A.V., Borisov, N.M., and Moskalev, A.A. (2014).  
618 Signaling pathway cloud regulation for in silico screening and ranking of the potential  
619 geroprotective drugs. *Front Genet* 5, 49. doi: 10.3389/fgene.2014.00049.
- 620 Zhavoronkov, A., Debonneuil, E., Mirza, N., and Artyuhov, I. (2012). Evaluating the impact of  
621 recent advances in biomedical sciences and the possible mortality decreases on the future  
622 of health care and Social Security in the United States. *Pensions Int J* 17, 241-251.
- 623 Zhavoronkov, A., and Litovchenko, M. (2013). Biomedical progress rates as new parameters for  
624 models of economic growth in developed countries. *Int J Environ Res Public Health* 10,  
625 5936-5952. doi: 10.3390/ijerph10115936.
- 626

No clear disease definition

Clear disease definition

Extracellular damage  
and aggregates

Intracellular damage  
and aggregates

DNA damage

Loss of regenerative ability

Loss of self-cleaning

Loss of immune function

Fibrosis

Systemic toxic damage  
of all aggregates

Loss of homeostatic  
regulation

Ageing - Pathology  
transition

Cancer

Alzheimer's

Myocardial infarction

Alzheimer's

Dementia

Parkinson's

Atrial fibrillation

Senescence

Diabetes

Obesity

Disability

Loss of function  
and homeostasis

Age-related  
diseases

Interventions:

Provided by:

Gen

Supplemental vitamins

Exercise

Wellness centers

Lifestyle

Diagnosed patients

Vitamins

Lifestyle management

Supplements

Interventions:

Provided by:

Pharmaceuticals

Pharmaceutical companies

Surgery

Hospitals

Radiotherapy

Medical devices

Medical device companies

Physiotherapy
